# 1 Nationwide genomic biobank in Mexico unravels demographic history and 2 complex trait architecture from 6,057 individuals

3  
4 Mashaal Sohail<sup>1,2,3,#</sup>, Amanda Y. Chong<sup>4,\*</sup>, Consuelo D. Quinto-Cortes<sup>1,\*</sup>, María J. Palma-  
5 Martínez<sup>1,\*</sup>, Aaron Ragsdale<sup>1</sup>, Santiago G. Medina-Muñoz<sup>1</sup>, Carmina Barberena-Jonas<sup>1</sup>,  
6 Guadalupe Delgado-Sánchez<sup>5</sup>, Luis Pablo Cruz-Hervert<sup>5,6</sup>, Leticia Ferreyra-Reyes<sup>5</sup>, Elizabeth  
7 Ferreira-Guerrero<sup>5</sup>, Norma Mongua-Rodríguez<sup>5</sup>, Andrés Jimenez-Kaufmann<sup>1</sup>, Hortensia  
8 Moreno-Macías<sup>7,8</sup>, Carlos A. Aguilar-Salinas<sup>9</sup>, Kathryn Auckland<sup>4</sup>, Adrián Cortés<sup>10</sup>, Víctor  
9 Acuña-Alonzo<sup>11</sup>, Alexander G. Ioannidis<sup>12</sup>, Christopher R. Gignoux<sup>13</sup>, Genevieve L. Wojcik<sup>14</sup>,  
10 Selene L. Fernández-Valverde<sup>1</sup>, Adrian V.S. Hill<sup>4,15</sup>, María Teresa Tusié-Luna<sup>7</sup>, Alexander J.  
11 Mentzer<sup>4,10</sup>, John Novembre<sup>2,16</sup>, Lourdes García-García<sup>5,#</sup>, Andrés Moreno-Estrada<sup>1,#</sup>

12  
13  
14 <sup>1</sup>Laboratorio Nacional de Genómica para la Biodiversidad (LANGEBIO), Unidad de Genómica Avanzada (UGA),  
15 CINVESTAV, Irapuato, Guanajuato, México.

16 <sup>2</sup>Department of Human Genetics, University of Chicago, Chicago, IL, USA.

17 <sup>3</sup>Centro de Ciencias Genómicas (CCG), Universidad Nacional Autónoma de México (UNAM), Cuernavaca,  
18 Morelos, México.

19 <sup>4</sup>The Wellcome Centre for Human Genetics, University of Oxford, Oxford, UK.

20 <sup>5</sup>Instituto Nacional de Salud Pública (INSP), Cuernavaca, Morelos, México.

21 <sup>6</sup>Facultad de Odontología, Universidad Nacional Autónoma de México (UNAM), Ciudad de México, México.

22 <sup>7</sup>Unidad de Biología Molecular y Medicina Genómica, UNAM-INCMNSZ, México City, México.

23 <sup>8</sup>Universidad Autónoma Metropolitana, México City, México.

24 <sup>9</sup>Division de Nutrición, Instituto Nacional de Ciencias Médicas y Nutrición Salvador Zubirán, Mexico City, México.

25 <sup>10</sup>Big Data Institute, Li Ka Shing Centre for Health Information and Discovery, University of Oxford, Oxford, UK.

26 <sup>11</sup>Escuela Nacional de Antropología e Historia (ENAH), Mexico City, México.

27 <sup>12</sup>Department of Biomedical Data Science, Stanford University, Stanford, CA, USA.

28 <sup>13</sup>Colorado Center for Personalized Medicine, University of Colorado Anschutz Medical Campus, Aurora, CO,  
29 USA.

30 <sup>14</sup>Department of Epidemiology, Johns Hopkins Bloomberg School of Public Health, Baltimore, MD, USA.

31 <sup>15</sup>The Jenner Institute, University of Oxford, Oxford, UK.

32 <sup>16</sup>Department of Ecology and Evolution, University of Chicago, Chicago, IL, USA.

33  
34 \*co-authorship

35 #co-corresponding

36  
37 Emails for correspondence: [andres.moreno@cinvestav.mx](mailto:andres.moreno@cinvestav.mx), [garcigarm@gmail.com](mailto:garcigarm@gmail.com),  
38 [mashaal@ccg.unam.mx](mailto:mashaal@ccg.unam.mx)

50 **Abstract:**

51 Latin America continues to be severely underrepresented in genomics research, and fine-scale  
52 genetic histories as well as complex trait architectures remain hidden due to the lack of Big Data.  
53 To fill this gap, the Mexican Biobank project genotyped 1.8 million markers in 6,057 individuals  
54 from 32 states and 898 sampling localities across Mexico with linked complex trait and disease  
55 information creating a valuable nationwide genotype-phenotype database. Through a suite of  
56 state-of-the-art methods for ancestry deconvolution and inference of identity-by-descent (IBD)  
57 segments, we inferred detailed ancestral histories for the last 200 generations in different  
58 Mesoamerican regions, unraveling native and colonial/post-colonial demographic dynamics. We  
59 observed large variations in runs of homozygosity (ROH) among genomic regions with different  
60 ancestral origins reflecting their demographic histories, which also affect the distribution of rare  
61 deleterious variants across Mexico. We analyzed a range of biomedical complex traits and  
62 identified significant genetic and environmental factors explaining their variation, such as ROH  
63 found to be significant predictors for trait variation in BMI and triglycerides.

64

65 The genetic architecture of complex traits in admixed genomes cannot be understood outside the  
66 context of their underlying histories. Present-day Mexico covers seven Mesoamerican regions  
67 with rich civilizational histories<sup>1</sup>. Archaeology and anthropology regionalize Mexico into the  
68 north of Mexico, the north of Mesoamerica, the center, occident and gulf of Mexico, Oaxaca and  
69 the Mayan region<sup>2</sup>(Fig. 1a). These are based on noting specific pre-Hispanic civilizations and  
70 cultures, which began flourishing very early in the Mayan region, in Oaxaca, in the occident and  
71 in the gulf of Mexico<sup>3</sup>, and later in the center and north of Mesoamerica. Such histories have also  
72 been used to classify Mesoamerican chronology into preclassical, classical, postclassical,  
73 colonial, and postcolonial periods.

74  
75 In the last five hundred years, Spanish colonization has left an indelible mark on this native  
76 tapestry. In a colonial context, ancestries that trace to European, African and Asian sources can  
77 be identified in living Mexicans, however they vary in structure and timing between  
78 Mesoamerican regions<sup>45-89-11</sup>. The heterogeneity of such a mixture at a genetic level has been  
79 characterized, revealing extensive fine-scale population substructure and ancestry sources across  
80 Mexico<sup>12-16</sup>. These studies have also identified genes potentially under selection for some traits in  
81 different native groups<sup>12,15</sup>.

82  
83 Further, such varying genetic histories, as captured by ancestry distributions, have been shown to  
84 impact variation in complex traits in Mexicans in traits such as lung force capacity<sup>12</sup>, and a  
85 number of other complex traits and diseases<sup>17</sup>. Nevertheless, a large gap remains in the  
86 representation of Mexicans from across Mexico in cohorts with linked genotypes and  
87 phenotypes, which could enable finer-scale studies of genetic history and a better understanding  
88 of complex trait architecture among individuals with diverse ancestries from the Americas and  
89 those living in rural areas<sup>18</sup>. Past efforts have been limited to studying individuals from the United  
90 States and Mexico City and have not simultaneously modelled the influence on complex trait  
91 variation of a rich array of genetic and environmental factors as is possible with a nationwide  
92 Biobank.

93  
94 To bridge this gap, we launched the Mexican Biobank (MXB) project, densely genotyping 6,057  
95 individuals from all 32 states across Mexico (Fig. S1-S2) recruited as part of the National Health  
96 Survey in 2000 (ENSA2000), which sampled more than 40,000 participants nationwide. To  
97 select the samples for genomic and biochemical characterization, we enriched for those  
98 individuals that can speak an indigenous language in each state while maximizing the  
99 representation of rural localities (~70% of the MXB out of a total of 898 localities, Fig. S2-S5) to  
100 increase the representation of indigenous ancestries. The MXB is 70% female and comprised of  
101 individuals born between 1910 and 1980, all sampled in the year 2000<sup>18</sup>(Table S1). These  
102 individuals were genotyped at ~1.8 million SNPs and have linked information for traits such as  
103 height, BMI, triglycerides, glucose, cholesterol, blood pressure and various socioeconomic and  
104 biogeographical markers (Table S2).

105  
106 Here, we leverage rich archaeological and anthropological information to guide a regionalized  
107 analysis of Mexico, and harness the power of local ancestry estimation genome-wide and  
108 segments of identity-by-descent (IBD) to decipher fine-scale genetic histories using ancestry-  
109 specific approaches to denote origins and historical population size changes<sup>19,20</sup>. We reveal a very  
110 heterogeneous landscape of both, painting a genetically informed picture of varying demographic

111 trajectories of Mesoamerican civilizations, as well as colonial migrations and dynamics in  
112 different regions of Mexico. We further investigate the role of these evolutionary histories as  
113 captured by proxies of genetic ancestries in shaping genetic variation and complex traits patterns  
114 in Mexico today. We show that these histories result in marked geographic and ancestry-specific  
115 patterns in the distributions of runs of homozygosity (ROH) and of the genomic burden of rare  
116 deleterious mutations.

117  
118 Lastly, we study the impact of these histories which could associate certain trait-relevant  
119 genotypes with certain genetic backgrounds, along with portions of the genome in ROH and  
120 other sociocultural and biogeographical factors capturing environmental context, on creating trait  
121 variation in complex and medically-relevant traits such as height, BMI, triglycerides, glucose  
122 levels, and others in Mexico. Our results can help guide sampling and design for future genetic  
123 mapping efforts by determining which environmental and genetic axes maximize trait variation,  
124 to help increase power in genome-wide association studies. They can also help determine cases  
125 where environmental interventions are more likely to bring a desired improvement in public  
126 health.

127  
128 **Genetic structure across Mexico is shaped by native diversity and historical migrations.**

129 We begin by excavating the population structure in the MXB at different geographic resolutions  
130 and time-scales. Principal components analysis (PCA)<sup>21</sup> captures predominant axes of genetic  
131 similarity. Further, a proxy for genetic ancestries from different regions can be quantified using  
132 ADMIXTURE<sup>22</sup> (see note on genetic ancestries in methods). When we visualize the Mexican  
133 biobank samples using PCA with individuals from around the world (1000 Genomes<sup>23</sup>, HGDP<sup>24</sup>,  
134 and PAGE<sup>25</sup>), we find that most Mexican individuals lie on a cline between living Europeans and  
135 indigenous Americans, which we interpret as reflecting the history of admixture in Mexico since  
136 Spanish colonization (Fig. 1B, Figs. S6). We also observe a “pull” towards present-day Africans,  
137 likely reflecting the genetic impact of the trans-Atlantic slave trade during the colonial period  
138 and subsequent migrations that brought many Africans to Mexico. When analyzed alone, the  
139 MXB individuals show a striking population substructure delineation between the Mayan region  
140 and the rest of the country (Fig. 1C, Fig. 1E, Figs. S7-S17). In the rest of the regions, only a  
141 subtle genetic substructure mirroring Mesoamerican geography is visible in the MXB, likely  
142 reflecting the effects of movement and mating among the different regions sampled in the year  
143 2000.

144  
145 We infer ancestry proxies at different geographic resolutions reflecting mating dynamics in the  
146 colonial and post-colonial periods by analyzing MXB with global individuals as well as with  
147 only native individuals using the software ADMIXTURE (Fig. 1D, Table S3, Fig. S11). We  
148 observe that individuals in the Mexican Biobank are inferred to be admixed with varying degrees  
149 of ancestries that are found most abundantly in individuals of the Americas (“American  
150 ancestries”) and Europe (“European ancestries”). Higher levels of ancestries from the Americas  
151 were inferred in the central and southern states of Mexico, compared to the northern states. We  
152 observe the largest genetic differentiation as measured using  $F_{st}$  along a north to southeast cline  
153 (Fig. S14-17). We observe some ancestries from Africa in individuals found in every single state  
154 (Table S3). We observe that only 3 states in the north (Chihuahua, Nuevo Leon and Sinaloa)  
155 have more ancestries on average from Europe than ancestries from the Americas, with ancestries  
156 from the Americas being the majority ancestries in every other state (Table S3). Lastly, we note

157 the presence of a small but significant proportion of ancestries from East Asia in almost every  
158 state (0-2.3%), the highest in the state of Guerrero (2.3%), and an even more modest but  
159 significant amount of ancestries from South Asia in the majority of states as well (0-0.8%).

160  
161 We use an ancestry-specific PCA or MDS approach to pinpoint the origins of the ancestries from  
162 the Americas, Africa, and Asia observed in the Mexican Biobank within those regions. For  
163 ancestries from the Americas, we observe that such ancestries tend to originate from indigenous  
164 cultures predominant in the region an individual is from (Fig. S18, Table S4). For example, such  
165 ancestries in the Yucatan peninsula originate from the Maya and Tzotzil. We observe that most  
166 ancestries from Africa in Mexico originate from West Africa<sup>26</sup>, in agreement with historical  
167 records of shipping voyages from the trans-Atlantic slave trade (Fig. S19)<sup>4</sup>. For the ancestries  
168 from East Asia, we find for individuals in Guerrero, such segments projecting to East Asian  
169 regions that were linked to the Manila Galleon trade, as reported in preliminary findings<sup>16</sup>. In  
170 contrast, for individuals from northern states such as Chihuahua, such segments project to China  
171 and Japan, likely reflecting later migrations from East Asia to Mexico (Fig. S20). Similarly, for  
172 ancestries from South Asia, as illustrated for individuals from Guerrero, the landing state of the  
173 Manila Galleon, we observe diverse roots in South Asia (Fig. S21-S22).

174  
175 The identification of individuals with genetic ancestries from East Asia in Mexico dating to the  
176 Manila Galleon trade agrees with one other recent study<sup>16</sup>. These genetic observations are  
177 plausibly explained by the poorly appreciated history of Mexico's Asian population<sup>5-8</sup>. Using  
178 voyage records, slaving documents, and other sources, historians have documented arrivals from  
179 the Manila port in the Spanish Philippines to the Acapulco port in Mexico through the 16<sup>th</sup> and  
180 17<sup>th</sup> centuries, with origins as diverse as the Philippines, Indonesia, Malaysia, India, Bengal, and  
181 Sri Lanka (though they were collectively referred to as "Chinos" by the colonists). They entered  
182 from the Acapulco port, but moved through most of Mexico, with even what was called the  
183 "China Road" existing between Acapulco and Mexico City. There have also been later 19<sup>th</sup> and  
184 20<sup>th</sup> century migrations from China and Japan, especially to the north of Mexico, and inheritance  
185 from these ancestors likely explains part of the ancestries from East Asia we observe in the  
186 northern states of the MXB today<sup>9-11</sup>.

187  
188 **Ancestry-specific IBD tracts recover 200 generations of genetic history within Mexico**

189 Apart from the small amount of recent ancestry from Asia discussed above, the ancestry of  
190 contemporary Mexicans arises predominantly from lineages that would have been found in  
191 Central America, Western Europe, and West Africa prior to 15<sup>th</sup> century. Each of these sources  
192 had different demographic histories prior to and after their arrival in present-day Mexico. To  
193 reveal the more recent history of population sizes of these three ancestries, we analyze identity-  
194 by-descent segments<sup>27</sup> overlapped with their corresponding local ancestry inference<sup>19</sup>. We use this  
195 approach to estimate effective population size ( $N_e$ ) trajectories 200 generations into the past for  
196 these ancestries in the Mexican Biobank as a whole, as well as in specific Mesoamerican regions  
197 (Figure 2). This analysis helps us reveal genetic histories of present-day Mexicans, which is of  
198 anthropological interest, as well as relevant for patterns of genetic and complex trait variation as  
199 shown in later sections.

200  
201 In the entire MXB, contextualized using Mesoamerican chronology (Fig. 2A), we find that, for  
202 indigenous lineages, (i.e., those present in the area before the arrival of the Spaniards), the

203 effective population size went through a slow and steady decline in the classical period (250 –  
204 900 CE). This decline was followed by an increase in the postclassical period (900 – 1521 CE),  
205 right before the arrival of the Spaniards, and then a decline later in the colonial period (1521 –  
206 1821 CE) and in the post-colonial period (1821 – present) (Fig. 2B).

207  
208 Further, we observe fine-scale structure in  $N_e$  trajectories for indigenous lineages which we  
209 interpret in the context of the different cultural histories of Mesoamerican regions (Fig. 2C)<sup>1</sup>.  
210 Starting chronologically, archaeologists document that Mesoamerican civilizations flourished  
211 very early in the Mayan region, in Oaxaca, in the occident and in the gulf of Mexico, where we  
212 also observe large  $N_e$  already in the classical period<sup>3</sup>. For example, in the gulf, where we observe  
213 high  $N_e$  since the pre-classical period (2500 BCE – 250 CE), there is archaeological evidence,  
214 among a myriad of other groups, of the Olmecs in the pre-classical period, the Totonacs in the  
215 classical period, and the Huastecs in the post-classical period<sup>28</sup>. In Oaxaca, we observe  $N_e$  rapidly  
216 growing in the pre-classical to the classical period, in line with archaeological inferences that the  
217 Zapotecs were already starting to create sedentary settlements in the pre-classical period  
218 followed by a rise in social and political structures in the classical period. This was followed by a  
219 more militaristic period in the post-classical causing warfare<sup>29</sup>, and our genetic evidence suggests  
220 a significant population decline toward the end of the post-classical period. In the Yucatan  
221 peninsula, the Maya had prominent civilizational spread in the classical period (peak  $N_e$   
222 observed), and started going through a slow decline only in the post-classical period due to what  
223 archaeologists have inferred as a combination of different political and ecological factors, and  
224 this trajectory is supported in the  $N_e$  trend<sup>3</sup>. We further observe that native groups in both Oaxaca  
225 and the Mayan peninsula started to increase in population size again through the colonial and  
226 post-colonial (1821 – present) periods, after the arrival of the Spaniards.

227  
228 This is in contrast with the center and north of Mesoamerica, where the Aztec empire had a  
229 strong-hold most recently and where we see increasing  $N_e$  in the post-classical right before the  
230 arrival of the Spaniards and into part of the colonial period, after which we start to see a  
231 population decline in  $N_e$ . Thus, the decline in  $N_e$  after the arrival of the Spaniards is most  
232 prominent in the center and north of Mesoamerica, and is actually followed by an increase in  
233 Oaxaca and the Mayan region, where native ancestries from Central America are most prevalent  
234 today as evidenced by the Admixture analysis (Table S3). As generational time can vary, we  
235 present our analysis at two extremes of 20 and 30 years per generation<sup>30</sup>(Fig. S23 and 2C,  
236 respectively).

237  
238 We observe that ancestries from Western Europe that entered the contemporary Mexican gene  
239 pool went through a sharp decline in effective population size during the colonial period. The  
240 extent of the founder effect varied by region, with the strongest effect seen in Oaxaca and the  
241 Mayan region (Fig. S24, S25). Similarly, ancestries from Western Africa in Mexico revealed  
242 stronger founder effects that varied by region with  $N_e$  ranging between  $10^3$  and  $10^4$  in the colonial  
243 period. The population size in the post-colonial period continued to grow in some regions such as  
244 the occident and north of Mexico and the Mayan region, compared to others (Fig. S26, S27).

245  
246 **Demographic histories impact patterns of genetic variation in Mexico**

247 *Small ROH prevalence is correlated with ancestry proxies*

248 We next analyze the patterns of ROH in the MXB and their relationship with geography and  
249 ancestry proxies. ROH patterns help further illuminate demographic and mating histories of  
250 Mexicans<sup>31</sup>, and are relevant for variation in complex traits if trait-relevant variation is partially  
251 recessive<sup>32</sup>. We identify ROH ( $\geq 1$  Mb) in the Mexican Biobank and observe that both the  
252 number of ROHs and the total length of ROH per individual increases as we move from north to  
253 southeast in the country (Fig. S28-29). We confirm that this is primarily due to individuals with  
254 more genetic ancestries from Central America also having more ROH in their genomes (Fig. 3A,  
255 Figs. S30-31, Table S5).

256  
257 Next, we asked whether this signal of higher ROH associated with higher ancestry from Central  
258 America is due to historical bottlenecks and small population sizes, or due to consanguinity. A  
259 bottleneck event or a long-term small population size will result in a large number of small  
260 ROH<sup>33</sup>. Consanguinity or marriage between relatives would instead result in fewer but longer  
261 ROH<sup>33</sup>. To answer this question, we analyze the total length of ROH per individual in each state,  
262 after first partitioning ROH by size (Fig. 3B). We observe that there are more ROH per  
263 individual moving southwards in Mexico in large part due to small ROH (smaller than those  
264 expected from recent consanguinity e.g.,  $< 8$  Mb), implying that bottlenecks and small  
265 population sizes rather than consanguinity have been largely responsible for more ROH in  
266 individuals with higher ancestries from Central America.

267  
268 Lastly, we observe that ROH that are found on segments of the genome from Central America  
269 are more frequently found in younger individuals compared to older individuals (Spearman's  $\rho$   
270 = 0.31,  $p = 0.016$ ) (Fig. 3C). We also verified that this correlation with birth year primarily  
271 derives from small ROH ( $\rho = 0.35$ ,  $p = 0.006$ ), and small ROH found on genomic segments  
272 from the Americas ( $\rho = 0.39$ ,  $p = 0.002$ ) (Fig. 3C). This result is at least partly due to younger  
273 individuals carrying more ancestries from Central America compared to older individuals,  
274 especially in the rural localities (Fig. S51), and agrees with recent observations about ancestry  
275 and ROH made in Mexican-Americans<sup>17</sup>. The observation of higher ancestries from Central  
276 America in younger individuals in rural areas may be due to either individuals in rural areas pro-  
277 creating at a higher rate, or individuals with other ancestries moving out from rural to urban  
278 areas. The observation of a larger number of small ROH in younger individuals in the MXB is  
279 relevant for parsing the genetic architecture of complex traits and diseases, especially those with  
280 a recessive component.

### 281 282 ***Rare deleterious variant burden is correlated with ancestry proxies***

283 We also investigated the effects of demographic history on the frequency distribution of genetic  
284 variants. If such an effect exists for variants that contribute to trait variation, it would imply  
285 varying genetic architectures for some traits that may be captured by ancestry proxies. This  
286 analysis is motivated by previous theoretical and empirical work showing that undergoing a  
287 bottleneck changes the allele frequency distribution in the group that experienced the  
288 bottleneck<sup>23,34,35</sup>. In particular, rare variants are lost or increase in frequency after the bottleneck.

289  
290 We can evaluate this effect within and between genes in the genome by calculating the genome  
291 load of genetic variants, or mutation burden. We calculated the genome-wide mutation burden by  
292 summing the derived alleles at each SNP in the genome for different types of variants  
293 (intergenic, synonymous, putatively deleterious). When considering only rare variants ( $DAF \leq$

294 5%), we observe that the total number of rare variants is negatively correlated with ancestries  
295 from Central America, while it is positively correlated with ancestries from Western Europe and  
296 West Africa (Fig. 4). Thus, individuals with higher ancestries from Central America carry fewer  
297 rare variants likely due to a history of more bottlenecking events compared to individuals with  
298 higher ancestries from Western Europe and West Africa. We observed the same general pattern  
299 for different types of variants. However, this effect of varying demographic histories on variant  
300 frequencies is strongest for putatively neutral variants (Fig. 4). We have verified these  
301 observations for rare variants with whole-genome sequences from the subset of Mexicans living  
302 in Los Angeles (MXL) from the 1000 Genomes Project to rule out ascertainment biases due to  
303 the array genotyping as the source of this effect (Fig. S50).

304  
305 As shown in previous studies, the effect of demographic history on the total mutation burden is  
306 minimal in MXB<sup>35-37</sup>. When we consider all frequencies (DAF  $\leq$  100%), we see only a small  
307 correlation between mutation burden and ancestries from different regions likely due to  
308 ascertainment bias as this correlation does not persist in whole genome sequence data from 1000  
309 Genomes (Fig. 4, Fig. S50). This is because while some rare variants are lost, some increase in  
310 frequency, compensating the total mutation burden, which overall remains unchanged.

### 311 **Complex traits display varying roles of genetics and environment**

312 Lastly, we assessed the contribution of genetic variation towards impacting variation in complex  
313 traits or disease in Mexico (Fig. S32). For example, ROH have been previously shown to have  
314 associations with a broad range of complex traits, and estimated to be negatively associated with  
315 height, weight, and cholesterol<sup>2</sup>. Such associations, if due to genetic factors, point towards a  
316 recessive architecture of the traits. Further, genetic ancestry proxies can also be associated with  
317 complex traits due to genetic factors, or due to differential experience of discrimination and other  
318 socioeconomic factors (Fig. S32). Such genetic factors can be different distributions of ROH or  
319 other differential patterns of genetic variation caused by demographic and environmental  
320 histories that vary among ancestries, and that can lead to the association of particular causal  
321 genotypes with ancestry proxies. Indeed, genetic ancestry proxies in Mexico are correlated with  
322 the number and length of ROH (Fig. 3A). We therefore model the association of genetic factors  
323 such as ancestry proxies and ROH with trait variation in the same model to disentangle these  
324 effects. As genetic ancestry proxies can also reflect differential environmental exposures, we  
325 consider in our model several environmental factors, to further disentangle the role of genetic  
326 factors reflected in ancestry proxies compared to environmental factors. Our model therefore  
327 also includes variables available in the MXB related to discrimination, socioeconomic  
328 opportunities, and living environment (collectively called sociocultural and biogeographical  
329 factors). We also account for cryptic relatedness and potential unmodelled environmental factors  
330 using a genetic relationship matrix and city or town of origin as random effects in a mixed model  
331 framework. Significant associations would give insight into the architecture, including the  
332 genetic architecture, of the trait in Mexico to help guide future efforts in genetic mapping, and in  
333 considering other interventions towards improving public health.

334  
335  
336 Aiming to first understand how the traits are distributed geographically and relative to single  
337 model covariates, we first visualize average trait values by units of our biogeographical and  
338 sociocultural factors to understand the dimensions of trait variation (Figs. 5A, S33-41). Next, we  
339 use a mixed model to estimate the contribution of genetic factors to trait variation jointly



340 modelled with the environmental factors (Figs. 5B, D-F, S42-49). Finally, we visualize trait  
341 values by birth year to assess their changes over time. We focus on several quantitative traits:  
342 height, BMI, triglycerides, cholesterol, glucose, blood pressure, and others. Our test predictive  
343 variables in the full model include genetic factors (genetic ancestry proxies from ADMIXTURE  
344 and ancestry-specific MDS analyses, and ROH in kb in each genome), life history factors (age,  
345 sex), sociocultural factors (educational attainment as a proxy for income levels (Fig. S42),  
346 whether they speak an indigenous language or not as a proxy for differential experience of  
347 discrimination/other cultural factors such as diet, whether they live in an urban or rural  
348 environment), and biogeographical factors (altitude, latitude and longitude). For height and other  
349 traits analyzed, a significant association with ancestry proxies could reflect the association of  
350 particular causal genotypes with those ancestries or associated unmodelled environmental factors  
351 such as nutrition. If the association is due to genetic factors, it should still not be interpreted as  
352 deterministic of a trait value, but makes a case for inclusion of diverse individuals in genetic  
353 studies of complex traits.

354  
355 *Height.* When viewed as averages per state, height values show a clear increasing pattern from  
356 southeast to northwest in the MXB (Fig. 5A). Even though every state shows a large variance  
357 (Fig. 5A), height shows a significant correlation with both latitude and longitude univariately  
358 (Figs. S34-35). With our explanatory mixed model, we can explain 66.33% of the variance for  
359 height. We find that individuals with higher ancestries from Central America are significantly  
360 shorter ( $\beta = -0.42, p < 2.2 \times 10^{-16}$ ) (Figure 5b). Further, considering ancestries at a finer  
361 resolution, we observe decreased height with a change in ancestries from the North of Mexico  
362 (Huichol, Tarahumara) to the Mayan region (Tojolabal, Maya) (Fig. S48). Notably, individuals  
363 having higher educational attainment are also estimated to be taller. After Bonferroni correction  
364 across traits and predictors, the relationship between ROH and height is not statistically  
365 significant ( $\beta = -0.07, p = 0.03$ ). Nevertheless, younger individuals with any range of  
366 ancestries from Central America are taller than older individuals with the same ancestries (Fig.  
367 5C). As the positive correlation between birth year and height for all individuals regardless of  
368 their ancestries demonstrates, height can also vary due to environmental factors or aging.

369  
370 *Body mass index (BMI).* BMI similarly shows a significant correlation with latitude and  
371 longitude univariately (Figs. S34-35). Our full mixed model explains 30.10% of the variation in  
372 BMI. In the full model, ROH remain significantly associated with lower BMI ( $\beta = -0.18, p =$   
373  $3.95 \times 10^{-5}$ ), while ancestry does not (Fig. 5D). BMI is also significantly correlated with birth  
374 year, increasing with older age, as well as with being female (Fig. 5D).

375  
376 *Triglycerides.* There are clear differences in levels by region that are more striking for  
377 cholesterol (see below) than for triglycerides (Fig. S33). Our full model explains 37.23% of the  
378 variation in triglyceride levels. Ancestries from Central America are significantly associated with  
379 higher triglyceride levels ( $\beta = 0.19, p = 3.17 \times 10^{-4}$ ) while the ROH carried by an individual  
380 are significantly associated with lower triglyceride levels ( $\beta = -0.18, p = 1.4 \times 10^{-4}$ ) (Fig.  
381 5D). Notably, age, being male, lower educational attainment and high altitude are also associated  
382 with higher triglyceride levels (Fig. 5D).

383  
384 *Cholesterol.* Cholesterol levels show a significant correlation with latitude and longitude  
385 univariately (Fig. S33-35). In the full model (explaining 29.49% of trait variation), we do not see

386 any correlation with genetic ancestry proxies or ROH, but we estimate significantly lower  
387 cholesterol in individuals who speak an indigenous language ( $\beta = -0.26, p = 6.93 \times 10^{-7}$ ).  
388 We also estimate higher cholesterol in those living in an urban environment, at high altitude or of  
389 a higher age (Fig. S43). For HDL and LDL levels, we similarly find a significantly lower  
390 cholesterol in those who speak an indigenous language but not related to ancestry (Fig. S43)  
391 likely indicating that cultural/diet factors are stronger than the genetic factors tested here. Living  
392 in in an urban environment is also significantly associated with high HDL and LDL levels (Fig.  
393 S43).

394  
395 *Glucose.* Glucose levels show a significant correlation with latitude in univariate analysis (Fig.  
396 S34). In the full model (explaining 28.62% of the trait variation), we estimate ancestries from  
397 Central America to be significantly correlated with higher glucose levels ( $\beta = 0.23, p =$   
398  $2.452 \times 10^{-5}$ ). Glucose also remains significantly associated with latitude (increasing  
399 northwards) and higher age (Figure 5d). For fasting glucose, where we reduce sample size by  
400 about four-fifths, ancestry from Central America still has a positive estimated coefficient (Fig.  
401 S45), but it is not significant with the smaller sample size.

402  
403 *Other traits.* We also analyze creatinine, and systolic and diastolic blood pressure  
404 (Fig. S44). Individuals that speak an indigenous language have significantly lower creatinine  
405 ( $\beta = -0.18, p = 1.32 \times 10^{-3}$ ). Living in an urban environment and altitude are significantly  
406 associated with higher creatinine. Only age and sex are significantly associated with diastolic and  
407 systolic blood pressure (adjusted by medication status) (Fig. S44).

408  
409 Overall, ancestries from Central America are significantly associated with trait variation for  
410 height, triglycerides, and glucose levels (Fig. S46), the ROH present in a genome with BMI and  
411 triglycerides (Fig. S47) levels, and native ancestry variation within Central America with height  
412 variation (Fig. S48-49). In contrast, cholesterol levels, creatinine levels, and blood pressure are  
413 significantly associated with environmental, but not genome-wide genetic factors. This does not  
414 rule out the effect that specific gene variants may have in the variation of these traits, as  
415 illustrated before by candidate gene approaches discovering functional variants exclusive to the  
416 Americas<sup>38</sup>.

## 417 418 **Conclusion.**

419 Our work is a demonstration of the value of generating genotype-phenotype data on  
420 underrepresented populations to reveal lesser-known genetic histories and generate findings of  
421 biomedical relevance. It is also an illustration of the joint modeling of genetic and environmental  
422 effects to reveal the etiology of complex traits and disease. In this project, we ensured diverse  
423 indigenous and rural presence in our sampling strategy, considered the fluidity of ancestries from  
424 different local and global regions in our analyses and evaluated their reflection in genetic and  
425 disease-relevant complex trait variation. By leveraging the largest nationwide genomic biobank  
426 in Mexico, we find diverse sources of ancestries in Mexico in light of its unique history, infer  
427 population size changes and runs of homozygosity using ancestry-specific haplotype identity that  
428 reveal an elaborate fine-scale structure in the country. We also show that demographic history  
429 affects the frequency distribution of genetic variants thus changing how many rare variants  
430 individuals with different ancestries carry. We observe a significant impact of genetic ancestries,  
431 ROH, as well as socioeconomic and biogeographic variables on a variety of complex traits

432 implicating the importance of both genetic and environmental factors in explaining complex trait  
433 variation and in considerations of potential public health interventions. Our results can inform  
434 the design of future studies in other admixed populations and the MXB will hopefully motivate  
435 additional efforts to strengthen local research capacity across Latin America and benefit  
436 underserved populations globally.

437

## 438 **Funding**

439 This work was supported by “The Mexican Biobank Project: Building Capacity for Big Data  
440 Science in Medical Genomics in Admixed Populations”, a binational initiative between Mexico  
441 and the UK co-funded equally by CONACYT (Grant number FONCICYT/50/2016), and The  
442 Newton Fund through The Medical Research Council (Grant number MR/N028937/1) awarded  
443 to AME and AH. MS was also supported by the Chicago Fellows program of the University of  
444 Chicago. Training activities in Mexico were hosted by CINVESTAV and supported in part by  
445 CABANA, a capacity strengthening project for bioinformatics in Latin America, funded by the  
446 Global Challenges Research Fund (GCRF) of the UK.

447

## 448 **Data availability**

449 The dataset for the 6,057 newly genotyped individuals from the MX biobank project are  
450 available at the European Genome-phenome Archive (EGA) through a Data Access Agreement  
451 with the Data Access Committee (EGA accession number in process).

452

## 453 **Code availability**

454 All custom scripts/approaches described in Methods will be made available from  
455 [https://github.com/msohail88/MXB\\_popstruct\\_complextraits](https://github.com/msohail88/MXB_popstruct_complextraits) on publication and all existing  
456 software packages and versions used are noted in Methods

457

## 458 **Acknowledgments**

459 We thank the participants of the *Encuesta Nacional de Salud, 2000* (2000 National Health  
460 Survey, ENSA 2000), conducted in Mexico nationwide by the *Secretaría de Salud* (Health  
461 Secretariat) and the *Instituto Nacional de Salud Pública* (National Institute of Public Health,  
462 INSP). We are grateful to Mauricio Hernández and Celia Alpuche-Aranda for Institutional  
463 support from INSP, Mitzi Flores, Rocío Nájera, and Adriana Garmendia for project management  
464 support, and to Carlos Conde, Victor Guerrero Lemus, Armando Mendez Herrera, Cruz Portugal  
465 García, Rosario Rodriguez, and Manuel Velazquez Mesa for biobank maintenance and sample  
466 preparation. We thank Mary Ortega, Cecilia Gutiérrez, and Sara García for technical assistance,

467 Jacob Cervantes for IT support, Harald Ringbauer for useful advice with the ROH analysis, Juan  
468 Esteban Rodriguez for helpful conversations about population structure in Mexico, and Arslan  
469 Zaidi for useful comments on an earlier draft of this manuscript.

470

#### 471 **Inclusion and Ethics statement**

472 Samples were collected as part of the 2000 National Health Survey (ENSA 2000) conducted by  
473 the National Institute of Public Health (INSP), and informed consent was obtained from all  
474 participants. The ENSA 2000 was carried out following the strictest ethical principles and in  
475 accordance with the Helsinki Declaration of Human Studies. Extracted DNA has been stored and  
476 maintained at the National Institute of Public Health (Cuernavaca, Mexico), and samples were  
477 genotyped at the Advanced Genomics Unit of CINVESTAV (Irapuato, Mexico) through a  
478 collaboration agreement. The data has been jointly analyzed promoting local leadership and  
479 participation of Mexican researchers and trainees. The project was reviewed and approved by the  
480 Research Ethics Committee and the Biosafety Committee of the National Institute of Public  
481 Health (IRB approvals CI: 1479 and CB: 1470). For the present project, personally identifiable  
482 data was removed from the data set.

483

#### 484 **References**

- 485 1. Michael D. Coe, R. K. *Mexico: From the Olmecs to the Aztecs*. (Thames & Hudson, 2013).
- 486 2. Vela, E. Áreas culturales: Oasisamérica, Aridamérica y Mesoamérica. *Arqueología*  
487 *Mexicana, edición especial* 28–29 (2018).
- 488 3. Gugliotta, G. The Maya: Glory and Ruin. *The National Geographic Magazine* 68–109  
489 (2007).
- 490 4. Trans-atlantic slave trade database. *Slave Voyages*. <https://www.slavevoyages.org/> (2018).
- 491 5. Seijas, T. *Asian Slaves in Colonial Mexico: From Chinos to Indians*. (Cambridge University  
492 Press, 2014).
- 493 6. Chávez, C. P. M. El alcalde de los chinos en la Provincia de Colima durante el siglo XVII:  
494 Un sistema de representación en torno a un oficio. *Letras Históricas E-ISSN: 2448-8372*  
495 (2009).
- 496 7. Kersey, D. O. LA ESCLAVITUD ASIÁTICA EN EL VIRREINATO DE LA NUEVA ESPAÑA,  
497 1565-1673. *Hist. Mex.* **61**, 5–57 (2011).

- 498 8. Carrillo, R. Asia llega a América. Migración e influencia cultural asiática en Nueva España  
499 (1565-1815). *Asiadémica* **3**, 81–98 (2014).
- 500 9. Mishima, M. E. O. *Siete migraciones japonesas en México: 1890-1978*. (El Colegio de  
501 Mexico, 1982).
- 502 10. Augustine-Adams, K. Prohibir el mestizaje con chinos: solicitudes de amparo, Sonora,  
503 1921-1935. *Rev. Indias* **72**, 409–432 (2012).
- 504 11. Guillén, M. L. Vivir para trabajar. La inserción laboral de los inmigrantes chinos en Chiapas,  
505 siglos XIX y XX. *Studium: Revista de humanidades* 113–140 (2013).
- 506 12. Moreno-Estrada, A. *et al.* The genetics of Mexico recapitulates Native American  
507 substructure and affects biomedical traits. *Science* **344**, 1280–1285 (2014).
- 508 13. García-Ortiz, H. *et al.* The genomic landscape of Mexican Indigenous populations brings  
509 insights into the peopling of the Americas. *Nat. Commun.* **12**, 5942 (2021).
- 510 14. Romero-Hidalgo, S. *et al.* Demographic history and biologically relevant genetic variation of  
511 Native Mexicans inferred from whole-genome sequencing. *Nat. Commun.* **8**, (2017).
- 512 15. Ávila-Arcos, M. C. *et al.* Population History and Gene Divergence in Native Mexicans  
513 Inferred from 76 Human Exomes. *Mol. Biol. Evol.* **37**, 994–1006 (2020).
- 514 16. Rodríguez-Rodríguez, J. E. *et al.* The genetic legacy of the Manila galleon trade in Mexico.  
515 *Philos. Trans. R. Soc. Lond. B Biol. Sci.* **377**, 20200419 (2022).
- 516 17. Spear, M. L. *et al.* Recent shifts in the genomic ancestry of Mexican Americans may alter  
517 the genetic architecture of biomedical traits. *Elife* **9**, (2020).
- 518 18. Popejoy, A. B. & Fullerton, S. M. Genomics is failing on diversity. *Nature* **538**, 161–164  
519 (2016).
- 520 19. Browning, S. R. *et al.* Ancestry-specific recent effective population size in the Americas.  
521 *PLoS Genet.* **14**, 1–22 (2018).
- 522 20. Moreno-Estrada, A. *et al.* Reconstructing the Population Genetic History of the Caribbean.  
523 *PLoS Genet.* **9**, (2013).

- 524 21. Novembre, J. *et al.* Genes mirror geography within Europe. *Nature* **456**, 98–101 (2008).
- 525 22. Alexander, D. H., Novembre, J. & Lange, K. Fast Model-Based Estimation of Ancestry in  
526 Unrelated Individuals. *Genome Res.* **19**, 1655–1664 (2009).
- 527 23. 1000 Genomes Project Consortium *et al.* A global reference for human genetic variation.  
528 *Nature* **526**, 68–74 (2015).
- 529 24. Li, J. Z. *et al.* Worldwide human relationships inferred from genome-wide patterns of  
530 variation. *Science* **319**, 1100–1104 (2008).
- 531 25. Wojcik, G. L. *et al.* Genetic analyses of diverse populations improves discovery for complex  
532 traits. *Nature* **570**, 514–518 (2019).
- 533 26. Patin, E. *et al.* Dispersals and genetic adaptation of Bantu-speaking populations in Africa  
534 and North America. *Science* **356**, 543–546 (2017).
- 535 27. Browning, S. R. & Browning, B. L. Accurate Non-parametric Estimation of Recent Effective  
536 Population Size from Segments of Identity by Descent. *Am. J. Hum. Genet.* **97**, 404–418  
537 (2015).
- 538 28. Diehl, R. A. *The Olmecs : America's first civilization.* (London : Thames & Hudson, 2004).
- 539 29. Marcus, J. & Flannery, K. Cultural Evolution in Oaxaca: the Origins of the Zapotec and  
540 Mixtec Civilizations. in *The Cambridge History of the Native Peoples of the Americas* 358–  
541 406 (Cambridge University Press, 2000). doi:10.1017/CHOL9780521351652.009.
- 542 30. Wang, R. J., Al-Saffar, S. I., Rogers, J. & Hahn, M. W. Human generation times across the  
543 past 250,000 years. (2021).
- 544 31. Ceballos, F. C., Joshi, P. K., Clark, D. W., Ramsay, M. & Wilson, J. F. Runs of  
545 homozygosity: windows into population history and trait architecture. *Nat. Rev. Genet.* **19**,  
546 220–234 (2018).
- 547 32. Clark, D. W. *et al.* Associations of autozygosity with a broad range of human phenotypes.  
548 *Nat. Commun.* **10**, 4957 (2019).

- 549 33. Ringbauer, H., Novembre, J. & Steinrücken, M. Parental relatedness through time revealed  
550 by runs of homozygosity in ancient DNA. *Nat. Commun.* **12**, 5425 (2021).
- 551 34. Henn, B. M. *et al.* Distance from sub-Saharan Africa predicts mutational load in diverse  
552 human genomes. *Proceedings of the National Academy of Sciences* 201510805 (2015)  
553 doi:10.1073/pnas.1510805112.
- 554 35. Henn, B. M., Botigué, L. R., Bustamante, C. D., Clark, A. G. & Gravel, S. Estimating  
555 Mutation Load in Human Genomes. *Nat. Rev. Genet.* **16**, 333–343 (2015).
- 556 36. Simons, Y. B., Turchin, M. C., Pritchard, J. K. & Sella, G. The deleterious mutation load is  
557 insensitive to recent population history. *Nat. Genet.* **46**, 220–224 (2014).
- 558 37. Do, R. *et al.* No evidence that selection has been less effective at removing deleterious  
559 mutations in Europeans than in Africans. *Nat. Genet.* **47**, 126–131 (2015).
- 560 38. Acuña-Alonzo, V. *et al.* A functional ABCA1 gene variant is associated with low HDL-  
561 cholesterol levels and shows evidence of positive selection in Native Americans. *Hum. Mol.*  
562 *Genet.* **19**, 2877–2885 (2010).

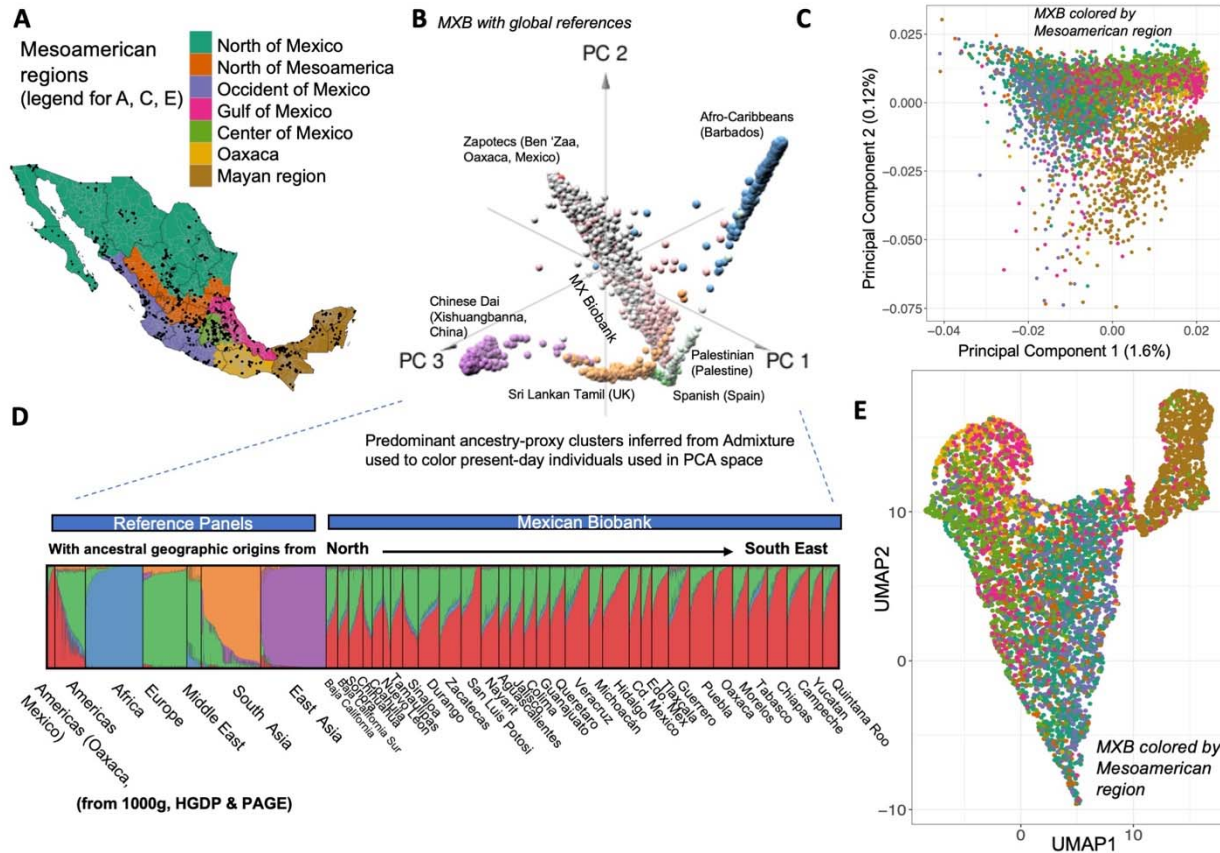

563  
 564 **Figure 1.** Visualizing genetic structure across the geography of the Mexican Biobank as inferred  
 565 by dimensionality reduction and unsupervised clustering. A) Mexico regionalized into  
 566 Mesoamerican regions according to anthropological and archaeological context. B) Principal  
 567 components analysis (PCA) of MXB with reference global data from the 1000G project, HGDP  
 568 and PAGE. Some specific sampled cohorts are labelled across the plot to orient the reader. C)  
 569 PCA with only MXB colored and regionalized into Mesoamerican regions. D) Unsupervised  
 570 clustering using Admixture and global reference panels (same as in B). E) UMAP analysis of  
 571 MXB colored by Mesoamerican regions.  
 572



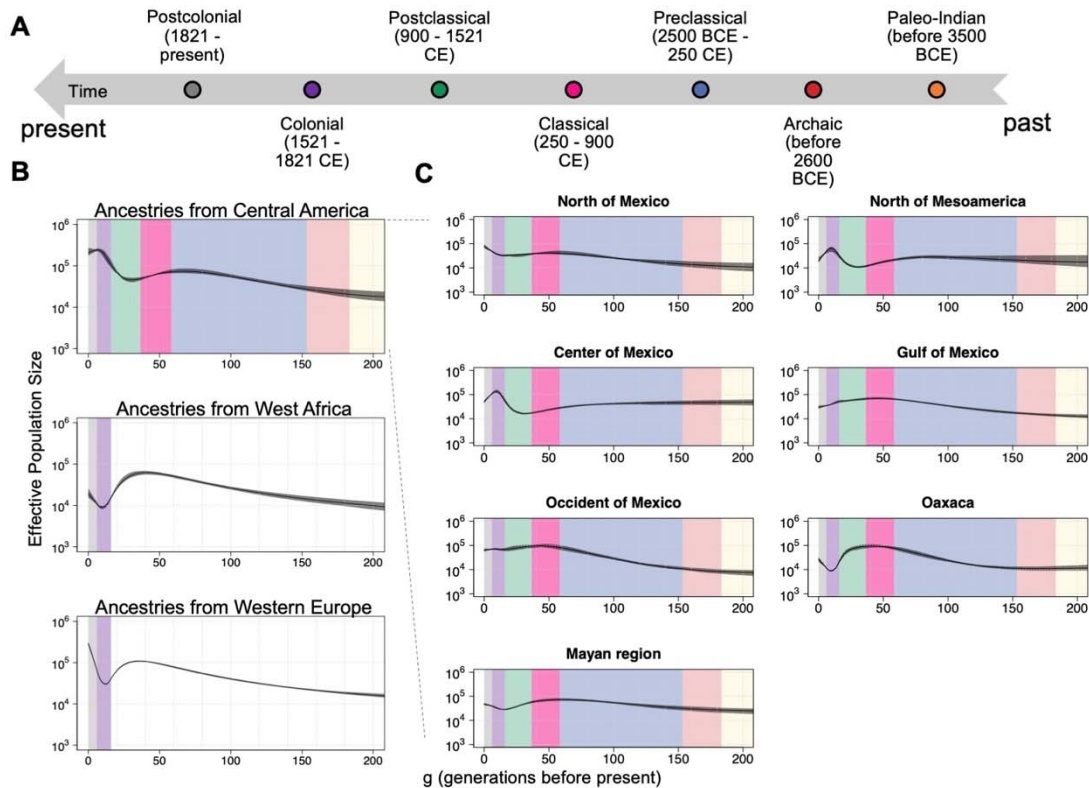

573  
 574 **Figure 2.** Effective population size ( $N_e$ ) changes inferred using identity-by-descent (IBD) tracts  
 575 across ancestries and geographies reveal the different histories present within Mexico. A)  
 576 Mesoamerican chronology coloring different periods in Mesoamerican history using  
 577 anthropological and archaeological context B) Ancestry-specific effective population size  
 578 changes over past 200 generations across Mexico (colored by chronology from A assuming 30  
 579 years per generation (see Figs. S23-27 for other generation intervals and ancestries). C)  
 580 Ancestry-specific effective population changes over time for ancestries from Central America in  
 581 different Mesoamerican regions of Mexico.  
 582

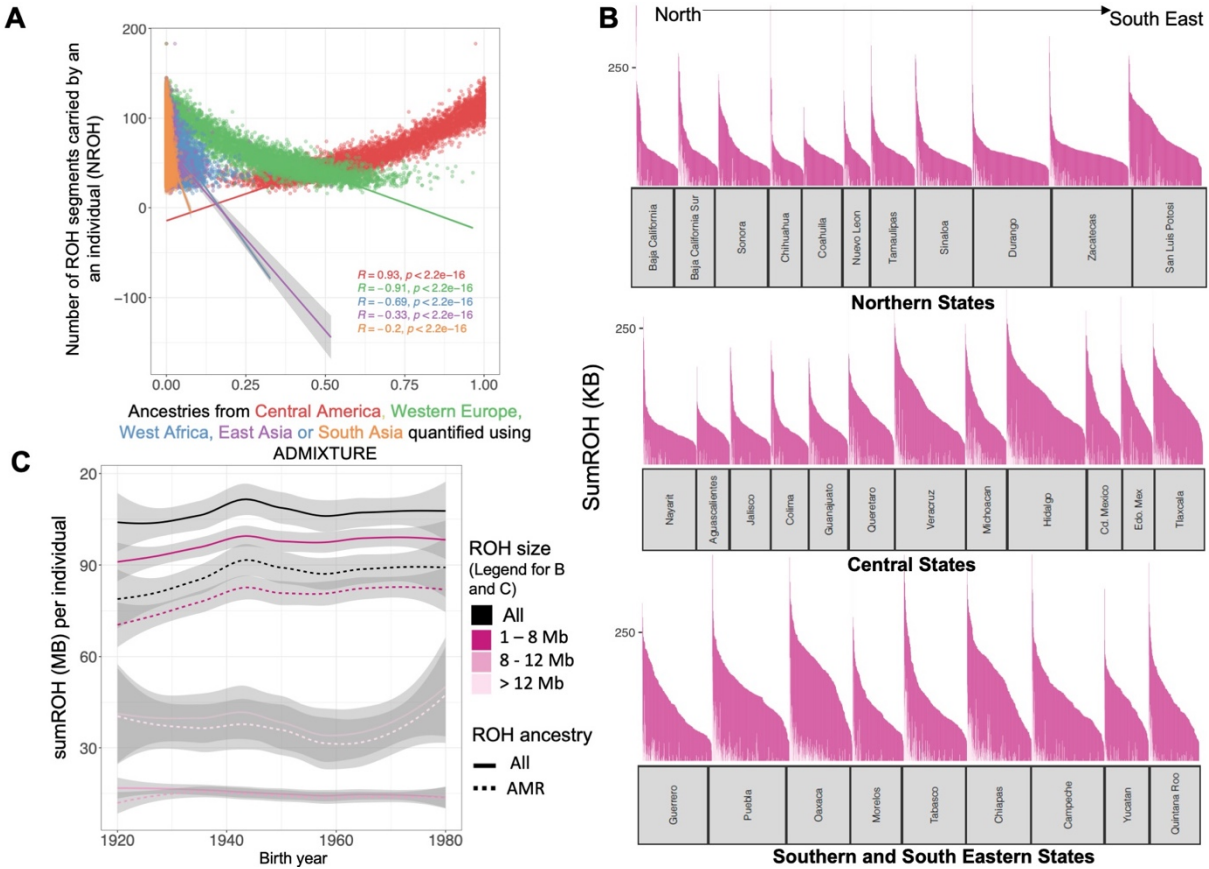

583  
 584 **Figure 3.** Analysis of runs of homozygosity (ROH) in each individual in MXB across ancestries,  
 585 geographies and birth year reveals the role of ancient and recent demographic movements to and  
 586 within Mexico. A) ROH are correlated with ancestries from global region in each individual  
 587 reflecting the impact of varied and shared demographic histories and bottlenecks. B) Distribution  
 588 of ROH segments of different sizes for each Northern, Central, Southern and Southeastern state.  
 589 The y-axis was truncated to aid visualization, truncating the first bar for some states. C) ROH as  
 590 a function of birth year. Solid lines show ROH overall, and dashed lines indicate ROH  
 591 overlapping ancestries from Central America. ROH are divided into small, medium and large  
 592 ROH same as in (B).

593

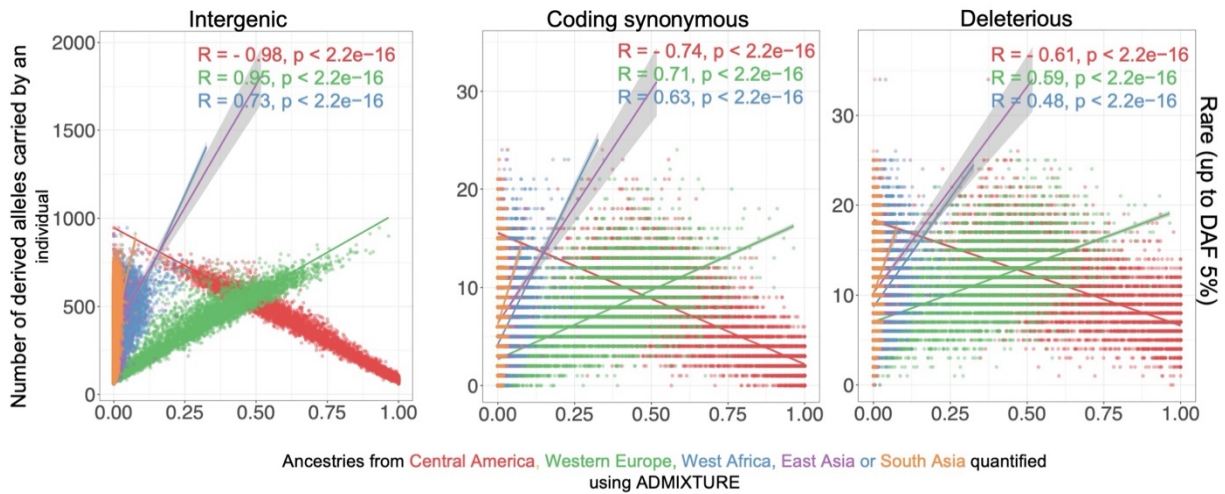

594

595

596

597

598

599

600

601

602

603

**Figure 4.** Mutation burden in different ancestries show effects of bottleneck in causing loss of rare variants. Rare variants are correlated with levels of ancestries from Central America, Western Europe or West Africa for rare variants (DAF < 5%), and common variants. Analysis of WGS from 1000 genomes MXL shows that the rare mutation burden result is robust while the full mutation burden correlation is caused by ascertainment bias of the MEGA array (Fig. S50). Variants were annotated using VEP, and deleterious variants are a combined set of missense variants predicted to be damaging by polyphen2 along with splice, stoploss and stopgain variants.

604

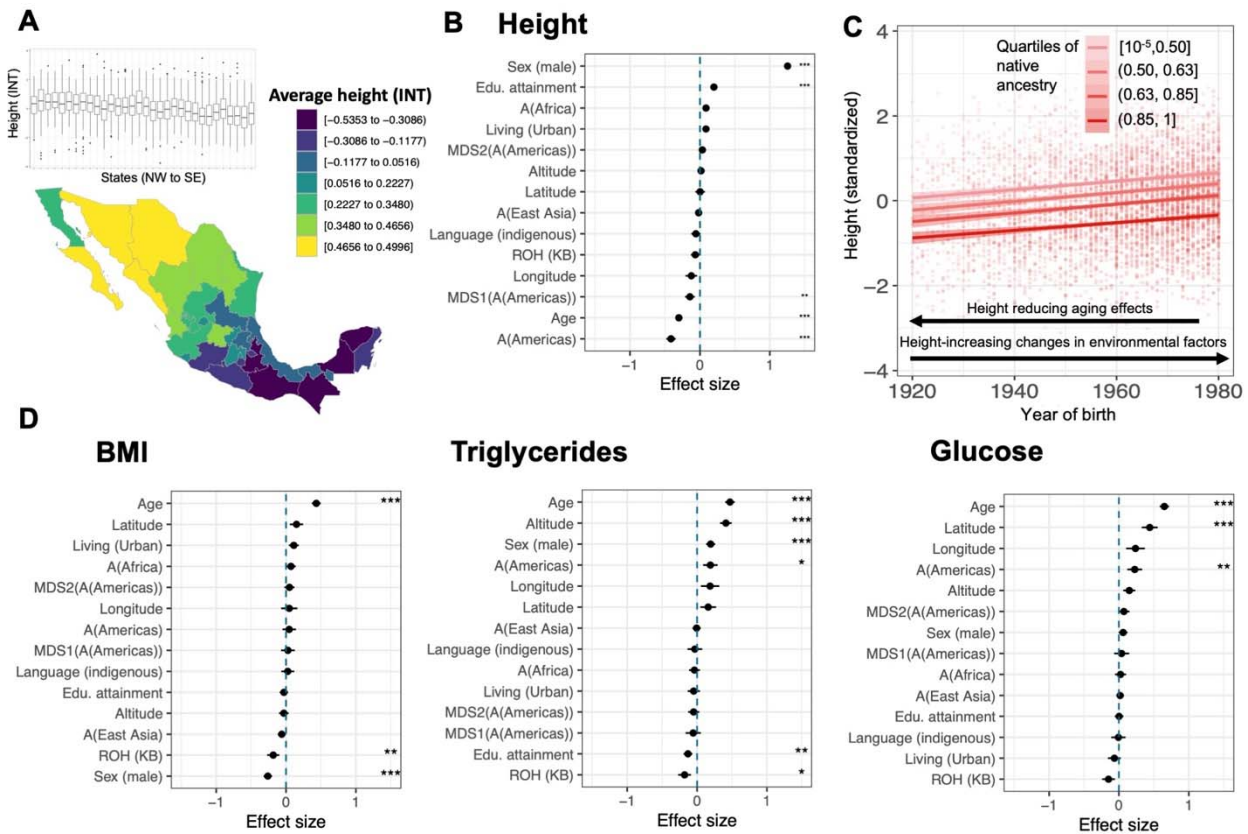

605

606 **Figure 5.** Height variation over space and birth year, and analysis of the factors influencing  
 607 height and other complex trait variation. A) Map of average height in Mexico (inset shows  
 608 boxplots of height variation in each state from North-west to South-east). B) Explanatory model  
 609 for height variation implicates the role of genetics and environment. The plot shows effect size  
 610 estimates and confidence intervals from a mixed model analysis. All quantitative predictors are  
 611 centered and scaled by 2 standard deviations. Asterisks indicate significance of the effect of a  
 612 predictor after Bonferroni correction (\*\*  $P < 10^{-5}$ , \*\*\*  $P < 10^{-6}$ ) across traits and predictors  
 613 analyzed. C) Height as a function of birth year in quartiles of ancestries from Central America.  
 614 D) Trait profiles for BMI, Triglycerides, and Glucose. Results of mixed model analysis same as  
 615 in (B). Educational attainment is on a scale from 0-8 (low to high educational attainment), and  
 616 altitude is measured in meters (low to high).

617

618

619

620

621
